# Supplementary material for: Belbin’s Team Role Balance and Team Effectiveness in Community Mental Health Teams in an Area of Northwest Ireland: Implications for Leadership
Source: MDPI journal article supplement (doi:10.3390/merits3030036), 2023-09-11
Supplement: s1 [file s1]

**Table S1.** Composition of each team in the investigated variables

|                        |                        | Teams |       |       |       |       |       |       |      |
|------------------------|------------------------|-------|-------|-------|-------|-------|-------|-------|------|
|                        |                        | A     | B     | C     | D     | E     | F     | G     | H    |
| Age                    | Mean                   | 45.4  | 45.7  | 44.3  | 45.5  | 43.0  | 44.3  | 39.6  | 46.5 |
|                        | SD                     | 10.64 | 10.16 | 12.11 | 12.07 | 9.94  | 12.03 | 12.90 | 7.27 |
| Team tenure<br>(years) | Mean                   | 3.5   | 3.2   | 2.6   | 4.2   | 3.2   | 7.5   | 1.9   | 8.7  |
|                        | SD                     | 3.87  | 3.97  | 2.31  | 2.15  | 2.35  | 6.98  | 1.73  | 4.70 |
| Years of experience    | Mean                   | 17.4  | 17.1  | 13.6  | 19.6  | 19.0  | 18.4  | 14.0  | 22.4 |
|                        | SD                     | 9.47  | 10.75 | 10.13 | 10.70 | 10.46 | 11.98 | 12.01 | 6.41 |
| Gender                 | Male                   | 10    | 5     | 7     | 5     | 3     | 5     | 4     | 4    |
|                        | Female                 | 15    | 2     | 10    | 8     | 7     | 14    | 3     | 4    |
| Professions            | Nurse                  | 16    | 2     | 9     | 7     | 5     | 10    | 2     | 4    |
|                        | Student Nurse          | 1     | 0     | 2     | 0     | 0     | 2     | 0     | 0    |
|                        | Doctor                 | 4     | 3     | 2     | 2     | 3     | 4     | 2     | 2    |
|                        | Occupational Therapist | 0     | 1     | 0     | 1     | 0     | 0     | 0     | 1    |
|                        | Social Worker          | 2     | 0     | 1     | 0     | 1     | 1     | 0     | 1    |
|                        | Secretary              | 2     | 0     | 2     | 2     | 1     | 1     | 1     | 0    |
|                        | Psychologist           | 0     | 1     | 1     | 1     | 0     | 1     | 2     | 0    |

**Table S2.** Comparison of numeric variables (age, years of experience and years of tenure) among the teams

| ANOVA                |                |                |     |             |       |       |
|----------------------|----------------|----------------|-----|-------------|-------|-------|
|                      |                | Sum of Squares | df  | Mean Square | F     | Sig.  |
| Age                  | Between Groups | 270.341        | 7   | 38.620      | 0.308 | 0.949 |
|                      | Within Groups  | 12292.008      | 98  | 125.429     |       |       |
|                      | Total          | 12562.349      | 105 |             |       |       |
| Years of experience  | Between Groups | 632.114        | 7   | 90.302      | 0.836 | 0.560 |
|                      | Within Groups  | 10580.348      | 98  | 107.963     |       |       |
|                      | Total          | 11212.462      | 105 |             |       |       |
| Team tenure in years | Between Groups | 474.622        | 7   | 67.803      | 3.919 | 0.001 |
|                      | Within Groups  | 1695.423       | 98  | 17.300      |       |       |
|                      | Total          | 2170.045       | 105 |             |       |       |

| Multiple Comparisons |          |          |                       |            |       |                         |             |
|----------------------|----------|----------|-----------------------|------------|-------|-------------------------|-------------|
| Bonferroni           |          |          |                       |            |       |                         |             |
| Dependent Variable   | (I) team | (J) team | Mean Difference (I-J) | Std. Error | Sig.  | 95% Confidence Interval |             |
|                      |          |          |                       |            |       | Lower Bound             | Upper Bound |
| age                  | A        | B        | -.31429               | 4.78910    | 1.000 | -15.6952                | 15.0667     |
|                      |          | C        | 1.10588               | 3.52070    | 1.000 | -10.2014                | 12.4131     |
|                      |          | D        | -.13846               | 3.82956    | 1.000 | -12.4377                | 12.1607     |
|                      |          | E        | 2.40000               | 4.19047    | 1.000 | -11.0583                | 15.8583     |
|                      |          | F        | 1.08421               | 3.40861    | 1.000 | -9.8631                 | 12.0315     |
|                      |          | G        | 5.82857               | 4.78910    | 1.000 | -9.5524                 | 21.2095     |
|                      |          | H        | -1.10000              | 4.54926    | 1.000 | -15.7106                | 13.5106     |
|                      | B        | A        | .31429                | 4.78910    | 1.000 | -15.0667                | 15.6952     |
|                      |          | C        | 1.42017               | 5.02957    | 1.000 | -14.7331                | 17.5734     |
|                      |          | D        | .17582                | 5.25040    | 1.000 | -16.6867                | 17.0383     |
|                      |          | E        | 2.71429               | 5.51917    | 1.000 | -15.0114                | 20.4399     |
|                      |          | F        | 1.39850               | 4.95176    | 1.000 | -14.5048                | 17.3018     |
|                      |          | G        | 6.14286               | 5.98638    | 1.000 | -13.0833                | 25.3690     |
|                      |          | H        | -.78571               | 5.79629    | 1.000 | -19.4014                | 17.8300     |
|                      | C        | A        | -1.10588              | 3.52070    | 1.000 | -12.4131                | 10.2014     |
|                      |          | B        | -1.42017              | 5.02957    | 1.000 | -17.5734                | 14.7331     |
|                      |          | D        | -1.24434              | 4.12632    | 1.000 | -14.4967                | 12.0080     |

|                     |   |   |          |         |       |          |         |
|---------------------|---|---|----------|---------|-------|----------|---------|
|                     |   | E | 1.29412  | 4.46330 | 1.000 | -13.0404 | 15.6287 |
|                     |   | F | -.02167  | 3.73894 | 1.000 | -12.0298 | 11.9865 |
|                     |   | G | 4.72269  | 5.02957 | 1.000 | -11.4305 | 20.8759 |
|                     |   | H | -2.20588 | 4.80174 | 1.000 | -17.6274 | 13.2157 |
|                     | D | A | .13846   | 3.82956 | 1.000 | -12.1607 | 12.4377 |
|                     |   | B | -.17582  | 5.25040 | 1.000 | -17.0383 | 16.6867 |
|                     |   | C | 1.24434  | 4.12632 | 1.000 | -12.0080 | 14.4967 |
|                     |   | E | 2.53846  | 4.71076 | 1.000 | -12.5909 | 17.6678 |
|                     |   | F | 1.22267  | 4.03111 | 1.000 | -11.7239 | 14.1692 |
|                     |   | G | 5.96703  | 5.25040 | 1.000 | -10.8954 | 22.8295 |
|                     |   | H | -.96154  | 5.03259 | 1.000 | -17.1245 | 15.2014 |
|                     | E | A | -2.40000 | 4.19047 | 1.000 | -15.8583 | 11.0583 |
|                     |   | B | -2.71429 | 5.51917 | 1.000 | -20.4399 | 15.0114 |
|                     |   | C | -1.29412 | 4.46330 | 1.000 | -15.6287 | 13.0404 |
|                     |   | D | -2.53846 | 4.71076 | 1.000 | -17.6678 | 12.5909 |
|                     |   | F | -1.31579 | 4.37543 | 1.000 | -15.3681 | 12.7366 |
|                     |   | G | 3.42857  | 5.51917 | 1.000 | -14.2971 | 21.1542 |
|                     |   | H | -3.50000 | 5.31239 | 1.000 | -20.5615 | 13.5615 |
|                     | F | A | -1.08421 | 3.40861 | 1.000 | -12.0315 | 9.8631  |
|                     |   | B | -1.39850 | 4.95176 | 1.000 | -17.3018 | 14.5048 |
|                     |   | C | .02167   | 3.73894 | 1.000 | -11.9865 | 12.0298 |
|                     |   | D | -1.22267 | 4.03111 | 1.000 | -14.1692 | 11.7239 |
|                     |   | E | 1.31579  | 4.37543 | 1.000 | -12.7366 | 15.3681 |
|                     |   | G | 4.74436  | 4.95176 | 1.000 | -11.1590 | 20.6477 |
|                     |   | H | -2.18421 | 4.72018 | 1.000 | -17.3438 | 12.9754 |
|                     | G | A | -5.82857 | 4.78910 | 1.000 | -21.2095 | 9.5524  |
|                     |   | B | -6.14286 | 5.98638 | 1.000 | -25.3690 | 13.0833 |
|                     |   | C | -4.72269 | 5.02957 | 1.000 | -20.8759 | 11.4305 |
|                     |   | D | -5.96703 | 5.25040 | 1.000 | -22.8295 | 10.8954 |
|                     |   | E | -3.42857 | 5.51917 | 1.000 | -21.1542 | 14.2971 |
|                     |   | F | -4.74436 | 4.95176 | 1.000 | -20.6477 | 11.1590 |
|                     |   | H | -6.92857 | 5.79629 | 1.000 | -25.5442 | 11.6871 |
|                     | H | A | 1.10000  | 4.54926 | 1.000 | -13.5106 | 15.7106 |
|                     |   | B | .78571   | 5.79629 | 1.000 | -17.8300 | 19.4014 |
|                     |   | C | 2.20588  | 4.80174 | 1.000 | -13.2157 | 17.6274 |
|                     |   | D | .96154   | 5.03259 | 1.000 | -15.2014 | 17.1245 |
|                     |   | E | 3.50000  | 5.31239 | 1.000 | -13.5615 | 20.5615 |
|                     |   | F | 2.18421  | 4.72018 | 1.000 | -12.9754 | 17.3438 |
|                     |   | G | 6.92857  | 5.79629 | 1.000 | -11.6871 | 25.5442 |
| Years of experience | A | B | .25714   | 4.44317 | 1.000 | -14.0128 | 14.5271 |
|                     |   | C | 3.81176  | 3.26638 | 1.000 | -6.6787  | 14.3023 |
|                     |   | D | -2.21538 | 3.55293 | 1.000 | -13.6262 | 9.1954  |
|                     |   |   |          |         |       |          |         |

|   |   |          |         |       |          |         |
|---|---|----------|---------|-------|----------|---------|
|   | E | -1.60000 | 3.88777 | 1.000 | -14.0862 | 10.8862 |
|   | F | -.96842  | 3.16240 | 1.000 | -11.1249 | 9.1881  |
|   | G | 3.40000  | 4.44317 | 1.000 | -10.8699 | 17.6699 |
|   | H | -4.97500 | 4.22065 | 1.000 | -18.5303 | 8.5803  |
| B | A | -.25714  | 4.44317 | 1.000 | -14.5271 | 14.0128 |
|   | C | 3.55462  | 4.66626 | 1.000 | -11.4318 | 18.5410 |
|   | D | -2.47253 | 4.87115 | 1.000 | -18.1170 | 13.1719 |
|   | E | -1.85714 | 5.12050 | 1.000 | -18.3024 | 14.5881 |
|   | F | -1.22556 | 4.59407 | 1.000 | -15.9801 | 13.5290 |
|   | G | 3.14286  | 5.55396 | 1.000 | -14.6945 | 20.9803 |
|   | H | -5.23214 | 5.37760 | 1.000 | -22.5031 | 12.0388 |
| C | A | -3.81176 | 3.26638 | 1.000 | -14.3023 | 6.6787  |
|   | B | -3.55462 | 4.66626 | 1.000 | -18.5410 | 11.4318 |
|   | D | -6.02715 | 3.82826 | 1.000 | -18.3222 | 6.2679  |
|   | E | -5.41176 | 4.14090 | 1.000 | -18.7109 | 7.8874  |
|   | F | -4.78019 | 3.46886 | 1.000 | -15.9210 | 6.3606  |
|   | G | -.41176  | 4.66626 | 1.000 | -15.3982 | 14.5747 |
|   | H | -8.78676 | 4.45490 | 1.000 | -23.0943 | 5.5208  |
| D | A | 2.21538  | 3.55293 | 1.000 | -9.1954  | 13.6262 |
|   | B | 2.47253  | 4.87115 | 1.000 | -13.1719 | 18.1170 |
|   | C | 6.02715  | 3.82826 | 1.000 | -6.2679  | 18.3222 |
|   | E | .61538   | 4.37048 | 1.000 | -13.4211 | 14.6519 |
|   | F | 1.24696  | 3.73993 | 1.000 | -10.7644 | 13.2583 |
|   | G | 5.61538  | 4.87115 | 1.000 | -10.0291 | 21.2598 |
|   | H | -2.75962 | 4.66906 | 1.000 | -17.7550 | 12.2358 |
| E | A | 1.60000  | 3.88777 | 1.000 | -10.8862 | 14.0862 |
|   | B | 1.85714  | 5.12050 | 1.000 | -14.5881 | 18.3024 |
|   | C | 5.41176  | 4.14090 | 1.000 | -7.8874  | 18.7109 |
|   | D | -.61538  | 4.37048 | 1.000 | -14.6519 | 13.4211 |
|   | F | .63158   | 4.05937 | 1.000 | -12.4057 | 13.6689 |
|   | G | 5.00000  | 5.12050 | 1.000 | -11.4453 | 21.4453 |
|   | H | -3.37500 | 4.92865 | 1.000 | -19.2041 | 12.4541 |
| F | A | .96842   | 3.16240 | 1.000 | -9.1881  | 11.1249 |
|   | B | 1.22556  | 4.59407 | 1.000 | -13.5290 | 15.9801 |
|   | C | 4.78019  | 3.46886 | 1.000 | -6.3606  | 15.9210 |
|   | D | -1.24696 | 3.73993 | 1.000 | -13.2583 | 10.7644 |
|   | E | -.63158  | 4.05937 | 1.000 | -13.6689 | 12.4057 |
|   | G | 4.36842  | 4.59407 | 1.000 | -10.3861 | 19.1230 |
|   | H | -4.00658 | 4.37922 | 1.000 | -18.0711 | 10.0580 |
| G | A | -3.40000 | 4.44317 | 1.000 | -17.6699 | 10.8699 |
|   | B | -3.14286 | 5.55396 | 1.000 | -20.9803 | 14.6945 |
|   | C | .41176   | 4.66626 | 1.000 | -14.5747 | 15.3982 |

|                            |   |   |                  |         |              |          |         |
|----------------------------|---|---|------------------|---------|--------------|----------|---------|
| Team<br>tenure in<br>years | H | D | -5.61538         | 4.87115 | 1.000        | -21.2598 | 10.0291 |
|                            |   | E | -5.00000         | 5.12050 | 1.000        | -21.4453 | 11.4453 |
|                            |   | F | -4.36842         | 4.59407 | 1.000        | -19.1230 | 10.3861 |
|                            |   | H | -8.37500         | 5.37760 | 1.000        | -25.6460 | 8.8960  |
|                            |   | A | 4.97500          | 4.22065 | 1.000        | -8.5803  | 18.5303 |
|                            |   | B | 5.23214          | 5.37760 | 1.000        | -12.0388 | 22.5031 |
|                            |   | C | 8.78676          | 4.45490 | 1.000        | -5.5208  | 23.0943 |
|                            |   | D | 2.75962          | 4.66906 | 1.000        | -12.2358 | 17.7550 |
|                            | A | E | 3.37500          | 4.92865 | 1.000        | -12.4541 | 19.2041 |
|                            |   | F | 4.00658          | 4.37922 | 1.000        | -10.0580 | 18.0711 |
|                            |   | G | 8.37500          | 5.37760 | 1.000        | -8.8960  | 25.6460 |
|                            |   | B | .32619           | 1.77862 | 1.000        | -5.3861  | 6.0385  |
|                            |   | C | .94804           | 1.30754 | 1.000        | -3.2513  | 5.1474  |
|                            |   | D | -.70128          | 1.42225 | 1.000        | -5.2691  | 3.8665  |
|                            |   | E | .28333           | 1.55629 | 1.000        | -4.7149  | 5.2816  |
|                            |   | F | -4.00132         | 1.26592 | .059         | -8.0670  | 0.0644  |
|                            | B | G | 1.58810          | 1.77862 | 1.000        | -4.1242  | 7.3004  |
|                            |   | H | -5.16042         | 1.68954 | 0.081        | -10.5866 | 0.2658  |
|                            |   | A | -.32619          | 1.77862 | 1.000        | -6.0385  | 5.3861  |
|                            |   | C | .62185           | 1.86792 | 1.000        | -5.3773  | 6.6210  |
|                            |   | D | -1.02747         | 1.94994 | 1.000        | -7.2900  | 5.2350  |
|                            |   | E | -.04286          | 2.04975 | 1.000        | -6.6260  | 6.5402  |
|                            |   | F | -4.32751         | 1.83902 | 0.577        | -10.2338 | 1.5788  |
|                            |   | G | 1.26190          | 2.22327 | 1.000        | -5.8785  | 8.4023  |
|                            | C | H | -5.48661         | 2.15267 | 0.346        | -12.4002 | 1.4270  |
|                            |   | A | -.94804          | 1.30754 | 1.000        | -5.1474  | 3.2513  |
|                            |   | B | -.62185          | 1.86792 | 1.000        | -6.6210  | 5.3773  |
|                            |   | D | -1.64932         | 1.53246 | 1.000        | -6.5711  | 3.2724  |
|                            |   | E | -.66471          | 1.65761 | 1.000        | -5.9884  | 4.6590  |
|                            |   | F | <b>-4.94936*</b> | 1.38860 | <b>0.016</b> | -9.4090  | -0.4897 |
|                            |   | G | .64006           | 1.86792 | 1.000        | -5.3591  | 6.6392  |
|                            |   | H | <b>-6.10846*</b> | 1.78331 | <b>0.025</b> | -11.8358 | -0.3811 |
|                            | D | A | .70128           | 1.42225 | 1.000        | -3.8665  | 5.2691  |
|                            |   | B | 1.02747          | 1.94994 | 1.000        | -5.2350  | 7.2900  |
|                            |   | C | 1.64932          | 1.53246 | 1.000        | -3.2724  | 6.5711  |
|                            |   | E | .98462           | 1.74952 | 1.000        | -4.6342  | 6.6035  |
|                            |   | F | -3.30003         | 1.49711 | 0.836        | -8.1082  | 1.5082  |
|                            |   | G | 2.28938          | 1.94994 | 1.000        | -3.9731  | 8.5519  |
|                            |   | H | -4.45913         | 1.86904 | 0.531        | -10.4618 | 1.5436  |
|                            | E | A | -.28333          | 1.55629 | 1.000        | -5.2816  | 4.7149  |
|                            |   | B | .04286           | 2.04975 | 1.000        | -6.5402  | 6.6260  |
|                            |   | C | .66471           | 1.65761 | 1.000        | -4.6590  | 5.9884  |

|   |   |                 |         |              |          |         |
|---|---|-----------------|---------|--------------|----------|---------|
| F | D | -0.98462        | 1.74952 | 1.000        | -6.6035  | 4.6342  |
|   | F | -4.28465        | 1.62498 | 0.273        | -9.5035  | 0.9342  |
|   | G | 1.30476         | 2.04975 | 1.000        | -5.2783  | 7.8879  |
|   | H | -5.44375        | 1.97296 | 0.194        | -11.7802 | 0.8927  |
|   | A | 4.00132         | 1.26592 | 0.059        | -0.0644  | 8.0670  |
|   | B | 4.32751         | 1.83902 | 0.577        | -1.5788  | 10.2338 |
|   | C | <b>4.94936*</b> | 1.38860 | <b>0.016</b> | 0.4897   | 9.4090  |
|   | D | 3.30003         | 1.49711 | 0.836        | -1.5082  | 8.1082  |
| G | E | 4.28465         | 1.62498 | 0.273        | -0.9342  | 9.5035  |
|   | G | 5.58941         | 1.83902 | 0.085        | -0.3169  | 11.4957 |
|   | H | -1.15910        | 1.75302 | 1.000        | -6.7892  | 4.4710  |
|   | A | -1.58810        | 1.77862 | 1.000        | -7.3004  | 4.1242  |
|   | B | -1.26190        | 2.22327 | 1.000        | -8.4023  | 5.8785  |
|   | C | -0.64006        | 1.86792 | 1.000        | -6.6392  | 5.3591  |
|   | D | -2.28938        | 1.94994 | 1.000        | -8.5519  | 3.9731  |
|   | E | -1.30476        | 2.04975 | 1.000        | -7.8879  | 5.2783  |
| H | F | -5.58941        | 1.83902 | 0.085        | -11.4957 | 0.3169  |
|   | H | -6.74851        | 2.15267 | 0.064        | -13.6621 | 0.1651  |
|   | A | 5.16042         | 1.68954 | 0.081        | -0.2658  | 10.5866 |
|   | B | 5.48661         | 2.15267 | 0.346        | -1.4270  | 12.4002 |
|   | C | <b>6.10846*</b> | 1.78331 | <b>0.025</b> | 0.3811   | 11.8358 |
|   | D | 4.45913         | 1.86904 | 0.531        | -1.5436  | 10.4618 |
|   | E | 5.44375         | 1.97296 | 0.194        | -0.8927  | 11.7802 |
|   | F | 1.15910         | 1.75302 | 1.000        | -4.4710  | 6.7892  |
|   | G | 6.74851         | 2.15267 | 0.064        | -0.1651  | 13.6621 |

\*. The mean difference is significant at the 0.05 level. **(In bold)**
